# Supplementary material
Source: publisher site journal article supplement (https://www.dovepress.com/article/578082)
Supplement: Supplementary file 1 [file 578082%20Appendix%201.docx]

**Appendix 1**

**Search strategy**

**China National Knowledge Infrastructure**

SU= (*'zhenci' + 'haozhen' + 'zhen' + 'dianzhen' + 'zhenjiu' + 'wenzhenjiu' + 'fuzhen' + 'touzhen' + 'huozhen' + 'yanzhen' + 'mianzhen'+ 'shouzhen' + 'jinsanzhen' + 'wan huaizhen' + 'pinghengzhen'*) AND SU*=*(*'buyunzheng' + 'buyun' + 'nvxingbuyun' + 'pailuanzhangaixingbuyun' + 'shuluanguanxingbuyun' + 'duonangluanchaozonghe zhengbuyun' + 'gaocuirusuxuezhengbuyun' + 'huangtigongnengbuquanbuyun' + 'zao faxingluanchaogongnengbuquanbuyun' + 'luanchaozaoshuaibuyun' + 'luanchaochu beigongnengxiajiangbuyun' + 'luanchaodifanyingbuyun' + 'wupailuanxingyichangzi gongchuxuebuyun' + 'huangsuhuaweipolieluanpaozonghezhengbuyun' + 'zigongnei moyiweizhengbuyun' + 'duanxu' + 'wuzi' + 'quanbuchan' + 'juechan' + 'bikou')* AND FT*='random'*

**Wan fang Data Knowledge Service Platform**

Title or keywords:( z*henci* or *haozhen* or *zhen* or *dianzhen* or *zhenjiu* or *wenzhenjiu* or *fuzhen* or *touzhen* or *huozhen* or *yanzhen* or *mianzhen* or *shouzhen* or *jinsanzhen* or *wan huaizhen* or *pinghengzhen)* and Title or keywords:(*buyunzheng* or *buyun* or *nvxingbuyun* or *pailuanzhangaixingbuyun* or *shuluanguanxingbuyun* or *duonangluanchaozonghezhengbuyun* or *gaocuirusuxuezhengbuyun* or *huangtigongnengbuquanbuyun* or *zaofaxingluanchaogongnengbuquanbuyun* or *luanchaozaoshuaibuyun* or *luanchaochubeigongnengxiajiangbuyun* or *luanchaodifanyingbuyun* or *wupailuanxingyichangzigongchuxuebuyun* or *huangsuhuaweipolieluanpaozonghezhengbuyun* or *zigongneimoyiweizhengbuyun* or *duanxu* or *wuzi* or *quanbuchan* or *juechan* or *bikou*）and All:( *random* )

**Chinese Scientific Journal Database (VIP)**

M=**（***zhenci* OR *haozhen OR zhen* OR *dianzhen* OR *zhenjiu* OR *wenzhenjiu* OR *fuzhen* OR *touzhen* OR *huozhen* OR *yanzhen* OR *mianzhen* OR *shouzhen* OR *jinsanzhen* OR *wanhuaizhen* OR *pinghengzhen***）**AND M=（*buyunzheng* OR *buyun* OR *nvxingbuyun* OR *pailuanzhangaixingbuyun* OR *shuluanguanxingbuyun* OR *duonangluanchaozonghezhengbuyun* OR *gaocuirusuxuezhengbuyun* OR *huangtigongnengbuquanbuyun* OR *zaofaxingluanchaogongnengbuquanbuyun* OR *luanchaozaoshuaibuyun* OR *luanchaochubeigongnengxiajiangbuyun* OR *luanchaodifanyingbuyun* OR *wupailuanxingyichangzigongchuxuebuyun* OR *huangsuhuaweipolieluanpaozonghezhengbuyun* OR *zigongneimoyiweizhengbuyun* OR *duanxu* OR *wuzi* OR *quanbuchan* OR *juechan* OR *bikou*）AND (U=*random*)

**Chinese Biology Medical** **(CBM)**

("*zhenci"* [Common field: Intelligence] OR "*haozhen* *"* [Common field: Intelligence] OR "*zhen"* [Common field: Intelligence]OR *"dianzhen"* [Common field: Intelligence] OR "*zhenjiu"* [Common field: Intelligence]OR *"wenzhenjiu"* [Common field: Intelligence] OR "*fuzhen"* [Common field: Intelligence]OR *"touzhen"* [Common field: Intelligence]OR "*huozhen"* [Common field: Intelligence]OR "*yanzhen"* [Common field: Intelligence] OR "*mianzhen"* [Common field: Intelligence] OR "*shouzhen"*  [Common field: Intelligence] "*jinsanzhen"* [Common field: Intelligence] OR "*wanhuaizhen"* [Common field: Intelligence]OR *"pinghengzhen"* [Common field: Intelligence]) AND(*"buyunzheng"* [Common field: Intelligence] OR *"buyun"* [Common field: Intelligence] OR *"nvxingbuyun"* [Common field: Intelligence] OR *"pailuanzhangaixingbuyun"* [Common field: Intelligence] OR *"shuluanguanxingbuyun"* [Common field: Intelligence] OR *"duonangluanchaozonghezhengbuyun"* [Common field: Intelligence] OR  *"gaocuirusuxuezhengbuyun"* [Common field: Intelligence] OR *"huangtigongnengbuquanbuyun"* [Common field: Intelligence] OR *"zao faxingluanchaogongnengbuquanbuyun"* [Common field: Intelligence] OR *"luanchaozaoshuaibuyun"* [Common field: Intelligence] OR *"luanchaochu beigongnengxiajiangbuyun"* [Common field: Intelligence] OR *"luanchaodifanyingbuyun"* [Common field: Intelligence] OR *"wupailuanxingyichangzigongchuxuebuyun"* [Common field: Intelligence] OR *"huangsuhuaweipolieluanpaozonghezhengbuyun"* [Common field: Intelligence] OR *"zigongneimoyiweizhengbuyun"* [Common field: Intelligence] OR *"duanxu"* [Common field: Intelligence] OR *"wuzi"* [Common field: Intelligence] OR *"quanbuchan"* [Common field: Intelligence] OR *"juechan"* [Common field: Intelligence] OR *"bikou"* [Common field: Intelligence]) AND ("*random* " [All fields: Intell] OR "Randomized Controlled Trial (Topic)" [Unweighted:Expansion] OR "Randomized Controlled Trial " [Unweighted: Expansion])

**Pubmed**

#1 Acupuncture[MeSH Terms]

#2 Acupuncture Points[MeSH Terms]

#3 Acupuncture therapy[MeSH Terms]

#4 Electroacupuncture[MeSH Terms]

#5 Acupuncture*[Title/Abstract] OR Acupuncture[Title/Abstract] OR Electroacupuncture* [Title/Abstract] OR Electro-acupuncture [Title/Abstract] OR Acupuncture Treatment[Title/Abstract] OR Acupuncture Treatments[Title/Abstract] OR acupuncture therapy[Title/Abstract] OR Acupoint Therapy[Title/Abstract] OR Needle Therapy[Title/Abstract] OR silver needle[Title/Abstract] OR fire needle[Title/Abstract] OR fire needling[Title/Abstract] OR Needle Warming Therapy[Title/Abstract] OR scalp acupuncture[Title/Abstract] OR Abdominal Acupuncture[Title/Abstract] OR eye acupuncture[Title/Abstract] OR face acupuncture[Title/Abstract] OR hand acupuncture[Title/Abstract] OR Jin’s three-needle[Title/Abstract] OR wrist-ankle acupuncture[Title/Abstract] OR balance acupuncture[Title/Abstract]

#6 #1 OR #2 OR #3 OR #4 OR #5

#7 Infertility[MeSH Terms]

#8 Infertility, Female[MeSH Terms]

#9 Infertility* [Title/Abstract] OR Infertility[Title/Abstract] OR Reproductive Sterility[Title/Abstract] OR Sterility[Title/Abstract] OR Subfertility[Title/Abstract] OR Sub-Fertility[Title/Abstract] OR Female Infertility[Title/Abstract] OR Postpartum Sterility[Title/Abstract] OR Female Sterility[Title/Abstract] OR Female Subfertility[Title/Abstract] OR Female Sub-Fertility[Title/Abstract] OR ovulatory disorder infertility[Title/Abstract] OR tubal infertility[Title/Abstract] OR polycystic ovary syndrome infertility[Title/Abstract] OR hyperpro-lactinemia infertility[Title/Abstract] luteal phase defect infertility[Title/Abstract] OR premature ovarian insufficiency infertility[Title/Abstract] OR premature ovarian failure infertility[Title/Abstract] OR diminished ovarian reserve infertility[Title/Abstract] OR poor ovarian response infertility[Title/Abstract] OR abnormal uterine bleeding-ovulatory disorders infertility[Title/Abstract] OR luteinized unruptured follicle syndrome infertility[Title/Abstract] OR endometriosis infertility[Title/Abstract]

#10 #7 OR #8 OR #9

11# Randomized Controlled Trial[Publication Type] OR Randomized Controlled Trials as Topic[MeSH Terms] OR Randomized Controlled Trial[All Fields] OR RCT[All Fields] OR Trial*[All Fields] OR Clinical trail[Title/Abstract]

OR random*[Title/Abstract]

#15 #6 AND #10 AND #11

**EMBASE**

#1 'Acupuncture'/exp

#2 'Acupuncture Points'/exp

#3 'Acupuncture therapy'/exp

#4 'Electroacupuncture'/exp

#5 'acupuncture*':ti,ab OR 'electroacupuncture*':ti,ab OR 'electro-acupuncture':ti,ab OR 'Acupuncture Treatment':ti,ab OR 'Acupuncture Treatments':ti,ab OR ' acupuncture therapy ':ti,ab OR 'Acupoint Therapy':ti,ab OR 'Needle Therapy':ti,ab OR 'silver needle':ti,ab OR 'fire needle':ti,ab OR 'fire needling':ti,ab OR 'Needle Warming Therapy':ti,ab OR 'scalp acupuncture':ti,ab OR 'Abdominal Acupuncture':ti,ab OR 'eye acupuncture':ti,ab OR 'face acupuncture':ti,ab OR 'hand acupuncture':ti,ab OR 'Jin three-needle':ti,ab OR 'wrist-ankle acupuncture':ti,ab OR 'balance acupuncture':ti,ab

#6 #1 OR #2 OR #3 OR #4 OR #5

#7 'Infertility'/exp

#8 'Infertility, Female'/exp

#9 'Infertility*':ti,ab OR 'Infertility':ti,ab OR 'Reproductive Sterility':ti,ab OR 'Sterility':ti,ab OR 'Subfertility':ti,ab OR 'Sub-Fertility':ti,ab 'Female Infertility':ti,ab OR 'Postpartum Sterility':ti,ab OR 'Female Sterility':ti,ab OR 'Female Subfertility':ti,ab OR 'Female Sub-Fertility':ti,ab OR 'ovulatory disorder infertility':ti,ab OR 'tubal infertility':ti,ab OR 'polycystic ovary syndrome infertility':ti,ab OR 'hyperpro-lactinemia infertility':ti,ab OR 'luteal phase defect infertility':ti,ab OR 'premature ovarian insufficiency infertility':ti,ab OR 'premature ovarian failure infertility':ti,ab OR 'diminished ovarian reserve infertility':ti,ab OR 'poor ovarian response infertility':ti,ab OR 'abnormal uterine bleeding-ovulatory disorders infertility':ti,ab OR 'luteinized unruptured follicle syndrome infertility':ti,ab OR 'endometriosis infertility':ti,ab

#10 #7 OR #8 OR #9

#11 'randomized controlled trial'/exp OR 'randomized controlled trial (topic)'/exp OR random*:ti,ab,kw OR 'RCT':ti,ab,kw OR Trial*:ti,ab,kw OR Clinical trail:ti,ab,kw

#12 #6 AND #10 AND #11

**Web Of Science**

#1 TS=(Acupuncture OR Acupuncture Points OR Acupuncture therapy OR Electroacupuncture)

#2 TS=(Electro-acupuncture OR Acupoint Therapy OR Acupuncture Treatment OR Acupuncture Treatments OR Acupoint Therapy OR Needle Therapy OR silver needle OR fire needle OR fire needling OR Needle Warming Therapy OR scalp acupuncture OR Abdominal Acupuncture OR eye acupuncture OR face acupuncture OR hand acupuncture OR Jin’s three-needle OR wrist-ankle acupuncture OR balance acupuncture)

#3 #1 OR #2

#4 TS=(Infertility* OR Infertility OR Reproductive Sterility OR Sterility OR Subfertility OR Sub-Fertility OR Female Infertility OR Postpartum Sterility OR Female Sterility OR Female Subfertility OR Female Sub-Fertility OR ovulatory disorder infertility OR tubal infertility OR polycystic ovary syndrome infertility OR hyperpro-lactinemia infertility ORluteal phase defect infertility OR premature ovarian insufficiency infertility OR premature ovarian failure infertility OR diminished ovarian reserve infertility OR poor ovarian response infertility OR abnormal uterine bleeding-ovulatory disorders infertility OR luteinized unruptured follicle syndrome infertility OR endometriosis infertility)

#5 #3 AND #4

#6 TS=(Randomized Controlled Trial) OR TS=(Randomized Controlled Trials as Topic) OR TS=(Randomized Controlled Trials as Topic) OR TS=(random*) OR TS=(RCT) OR TS=(Trial*) OR TS=(Clinical trail)

#7 #5 AND #6

**Cochrane Library**

#1 MeSH descriptor: [acupuncture] explode all trees

#2 MeSH descriptor: [acupuncture therapy] explode all trees

#3 MeSH descriptor: [acupuncture points] explode all trees

#4 MeSH descriptor: [electroacupuncture] explode all trees

#5 'acupuncture*':ti,ab OR 'electroacupuncture*':ti,ab OR 'electro-acupuncture':ti,ab OR 'Acupuncture Treatment':ti,ab OR 'Acupuncture Treatments':ti,ab OR ' acupuncture therapy ':ti,ab OR 'Acupoint Therapy':ti,ab OR 'Needle Therapy':ti,ab OR 'silver needle':ti,ab OR 'fire needle':ti,ab OR 'fire needling':ti,ab OR 'Needle Warming Therapy':ti,ab OR 'scalp acupuncture':ti,ab OR 'Abdominal Acupuncture':ti,ab OR 'eye acupuncture':ti,ab OR 'face acupuncture':ti,ab OR 'hand acupuncture':ti,ab OR 'Jin three-needle':ti,ab OR 'wrist-ankle acupuncture':ti,ab OR 'balance acupuncture':ti,ab

#6 #1 OR #2 OR #3 OR #4 OR #5

#7 MeSH descriptor: [Infertility] explode all trees

#8 MeSH descriptor: [Infertility, Female] explode all trees

#9 'Infertility*':ti,ab OR 'Infertility':ti,ab OR 'Reproductive Sterility':ti,ab OR 'Sterility':ti,ab OR 'Subfertility':ti,ab OR 'Sub-Fertility':ti,ab OR 'Female Infertility':ti,ab OR 'Postpartum Sterility':ti,ab OR 'Female Sterility':ti,ab OR 'Female Subfertility':ti,ab OR 'Female Sub-Fertility':ti,ab OR 'ovulatory disorder infertility':ti,ab OR 'tubal infertility':ti,ab OR 'polycystic ovary syndrome infertility':ti,ab OR 'hyperpro-lactinemia infertility':ti,ab OR 'luteal phase defect infertility':ti,ab OR 'premature ovarian insufficiency infertility':ti,ab OR 'premature ovarian failure infertility':ti,ab OR 'diminished ovarian reserve infertility':ti,ab OR 'poor ovarian response infertility':ti,ab OR 'abnormal uterine bleeding-ovulatory disorders infertility':ti,ab OR 'luteinized unruptured follicle syndrome infertility':ti,ab OR 'endometriosis infertility':ti,ab

#10 #7 OR #8 OR #9

#11 MeSH descriptor: [Randomized Controlled Trial] explode all trees

#12 MeSH descriptor: [Randomized Controlled Trials as Topic] explode all trees

#13(random*):ti,ab,kw OR (RCT):ti,ab,kw OR (Trial*):ti,ab,kw OR (Clinical trail):ti,ab,kw

#14 #11 AND #12 AND #13

#15 #6 AND #10 AND #14
